# Supplementary material for: Topographically Distinguished Microbiome Taxonomy and Stress-Response Genes of Royal Belum Rainforest and Raja Muda Musa Peat Swamp Revealed through Metagenomic Inquisition
Source: MDPI journal article supplement (doi:10.3390/ijms24010872), 2023-01-03
Supplement: s1 [file s1]

S1: DNA Quantity of Royal Belum and Raja Musa sites

| Sample Name   | Sample ID | Qubit<br>Concentration<br>(ng/ $\mu$ L) | Molarity<br>Estimation (nm) | Size (bp) |
|---------------|-----------|-----------------------------------------|-----------------------------|-----------|
| Royal Belum 1 | SK        | 10.94                                   | 27.858                      | 595       |
| Royal Belum 2 | SP        | 7.84                                    | 21.288                      | 558       |
| Royal Belum 3 | SR        | 5.00                                    | 13.528                      | 560       |
| Raja Musa 1   | RM1       | 9.87                                    | 25.114                      | 573       |
| Raja Musa 2   | RM2       | 12.05                                   | 29.719                      | 583       |
| Raja Musa 3   | RM3       | 8.92                                    | 23.528                      | 584       |
